# Supplementary material for: Inhibitors of Alphavirus Entry and Replication Identified with a Stable Chikungunya Replicon Cell Line and Virus-Based Assays
Source: PLoS One. 2011 Dec 19;6(12):e28923. doi: 10.1371/journal.pone.0028923 (PMC3242765; doi:10.1371/journal.pone.0028923)
Supplement: Figure S1 — Chemical structures of 10H-phenothiazines identified as SFV entry inhibitors. (DOCX) [file pone.0028923.s001.docx]

**Figure S1.** Chemical structures of 10*H*-phenothiazines identified as SFV entry inhibitors.

| **Compound** | **R1** | | **R2** |
| --- | --- | --- | --- |
| Chlorpromazine | Cl- | | CH2CH2CH2N(CH3)2 |
| Ethopropazine | H | | CH2 C(HCH3)N(CH2CH3) 2 |
| Methdilazine | H | |  |
| Perphenazine | Cl |  | | | |
| Thiethylperazine | SCH2CH3 |  | | |
| Thioridazine | SCH3 |  | | |
