# Supplementary material for: Inhibitors of Alphavirus Entry and Replication Identified with a Stable Chikungunya Replicon Cell Line and Virus-Based Assays
Source: PLoS One. 2011 Dec 19;6(12):e28923. doi: 10.1371/journal.pone.0028923 (PMC3242765; doi:10.1371/journal.pone.0028923)
Supplement: Table S1 — Primary screening of chemical libraries. Compounds were tested at 50 µM concentration. See Materials and Methods of the article for experimental details. (XLS) [file pone.0028923.s002.xls]

## Sheet: FINAL
SUPPLEMENTARY TABLE 1. Primary screening of chemical libraries. Compounds were tested at 50 µM concentration. See Materials and Methods of the article for experimental details.
Natural compounds (NC)			CHIKV replicon		SFV replicationa
Chemical name	MW	Supplier	% left	SD	% left	SD
Acacetin	284.3	Carl Roth GmbH, Germany	103.3	10.3	78.0803	11.7
Alphanaphthoflavone	272.9	Acros, USA	30.8	5.2	14.5759	5.3
Apigenin	270.2	Fluka, Switzerland	8.7	6.6	17.9762	5.4
L-ascorbic acid	176.1	Sigma, Germany	106.1	16.2	81.4	12.2
Benzoic acid	122.1	Merck, Germany	99.1	7.4	71.5895	10.5
3-Benzoylbenzo(F)coumarin	300.3	Acros, USA	68	8.5	39.9324	8.5
3-(2-Benzoxazolyl)umbelliferone	279.3	Fluka, Switzerland	61.8	8.9	21.0109	6.3
Bergapten, 5-Methoxypsoralen	216.2	Carl Roth GmbH, Germany	100.5	9	46.7786	7.1
Butylated hydroxyanisole	180.2	Sigma, Germany	79.9	11.8	66.7502	10.5
Caffeic acid	180.2	Sigma, USA	85.2	10.2	98.6575	12.8
(+)-Catechin	290.3	Sigma, USA	96.5	7.3	64.471	11.7
Catechol	110.1	Sigma, Germany	77.7	6.9	58.3504	14.3
Chrysin	254.3	Extrasynthese, France	13.8	5.4	18.1158	7.5
o-Coumaric acid	164.2	Sigma, USA	98.6	12.2	77.5647	11.9
Coumarin 102	255.3	Acros, USA	65.4	10.7	34.6	9
Coumarin 30	347.4	ICN, USA	44.1	7.5	12.2985	8.4
Coumarin 7	333.4	Acros, USA	51.8	6.4	37.2835	9.2
Coumarin	146.2	Merck, Germany	85	9.2	68.7887	6
Cyanidin chloride	322.7	Carl Roth GmbH, Germany	54.8	1.9	24.4798	10
Daidzein	254.3	Extrasynthese, France	104.4	7.2	76.5642	8
Daphnetin	178.2	Extrasynthese, France	92.1	4	81.7161	8.9
7-Diethylamino-3-thenoylcoumarin	327.4	Acros, USA	36.9	3.1	15.6193	10.7
2,3-Dihydroxybenzoic acid	154.1	Fluka, Switzerland	105.1	10.2	93.0828	8
2,5-Dihydroxybenzoic acid	154.1	Fluka, Switzerland	83.7	10.8	127.8	12.6
2,6-Dihydroxybenzoic acid	154.1	Fluka, Switzerland	62.3	9.5	118.677	10.7
3,4-Dihydroxybenzoic acid	154.1	Fluka, Switzerland	101.6	6.7	124.456	8
3,5-Dihydroxybenzoic acid	154.1	Fluka, Switzerland	87.8	4.9	6.92077	8.5
2,5-Dimethylphenol	122.2	Fluka, Switzerland	100.5	8.9	84.5573	7.1
5-Dimethylaminonaphthalene-1-sulfonylchloride	269.8	Fluka, Switzerland	10.4	4.1	4.55744	9.2
Ellagic acid	302.2	Sigma,USA	71.1	5.4	64.9019	7.5
(-)-Epicatechin	290.3	Sigma,USA	79.6	8.9	97.0854	10.5
(-)-Epicatechin gallate	442.4	Extrasynthese, France	100.5	3.9	94.8308	8.4
(-)-Epigallocatechin	306.3	Extrasynthese, France	89.9	4.4	101.863	6.5
(-)-Epigallocatechin gallate	458.4	Extrasynthese, France	90.4	7.2	155.315	9.1
Ethoxyquin	217.3	Sigma, USA	83.6	2.9	96.356	10.5
Ferulic acid	194.2	Extrasynthese, France	55.8	6.1	63.443	14.1
Flavone	222.3	Carl Roth GmbH, Germany	39.4	6.2	52.2255	12.7
Gallic acid	170.1	Sigma, USA	88.9	7	148.843	18.2
Genistein	270.2	Extrasynthese, France	62.1	4.1	45.6229	15
Gitoxigenin	390.5	Carl Roth GmbH, Germany	81.4	8	102.726	10.2
Gossypin	648.5	Extrasynthese, France	104.3	6.7	105.826	8.2
Hamamelitannin	484.4	Extrasynthese, France	40.1	7.8	14.6742	10.2
Hesperidin	610.6	Extrasynthese, France	102.2	6	77.6716	9.9
2-Hydroxyacetophenone	136.2	Fluka, Switzerland	99.4	8.7	129.733	8
3-Hydroxyacetophenone	136.2	Fluka, Switzerland	97.4	5.3	125.8	9.6
4-Hydroxyacetophenone	136.2	Fluka, Switzerland	94.5	5.4	29.3842	9.5
2-Hydroxyphenylacetic acid	152.2	Fluka, Switzerland	14.3	6.3	7.25038	10.5
3-hydroxyphenylacetic acid	152.2	Fluka, Switzerland	54.1	3.7	110.786	13.4
4-Hydroxyphenylacetic acid	152.2	Fluka, Switzerland	87.2	6	103.59	11.9
Hydroquinone	110.1	Fluka, Switzerland	72.9	5.9	16.8976	7.3
Isopropyl gallate	212.2	Lancaster, UK	79.3	5.1	123.96	9.9
2,4-Dihydroxylbenzoic acid	154.1	Fluka, Switzerland	29.5	6.4	32.0629	8.3
Isorhamnetin	316.3	Extrasynthese, France	19.3	5.5	28.9195	6.5
Kaempferol	286.3	Extrasynthese, France	11.5	3.2	2.93425	5
Khellin	260.2	Carl Roth GmbH, Germany	95.4	8.2	120.553	8.4
Lauryl gallate	338.5	Fluka, Switzerland	6.1	4.9	12.3181	9
Leucocyanidin	306.3	Carl Roth GmbH, Germany	84.1	8.1	136.327	11.1
Luteolin	286.3	Extrasynthese, France	95	7.9	71.2651	8
Luteolin-7-glucoside	448.4	Extrasynthese, France	54.4	5.1	17.7701	7.2
Malvin chloride	691	Extrasynthese, France	72.3	8.5	15.4363	8.9
Methyl gallate	184.2	Fluka, Switzerland	100.7	6.1	67.8305	9.3
Methylumbelliferone	175.1	Dr. Theodor Schuchardt, G.m.g.H., Germany	21.1	1.9	12.0459	5.6
2'-Methoxy-a-naphthoflavone	302.3	ICC, USA	81	7	45.7928	4
Morin dihydrate	338.3	Carl Roth GmbH, Germany	102.6	4.7	82.9207	5.4
Myricetin	318.3	Extrasynthese, France	49.1	8.5	1.96414	5.6
Naringenin	272.3	Sigma, Germany	6.2	4.9	-0.0735814	7.6
4-Methyl pyrocatechol	124.1	Merck, Germany	98.8	10.2	111.1	10.4
Nordihydroguaiaretic acid	302.4	Fluka, Switzerland	28.3	8.2	35.5647	7.4
Octyl gallate	282.3	Fluka, Switzerland	94.1	8.2	134.446	15.4
Phthalic acid	166.1	Merck, Germany	96.6	9.9	143.706	19.2
Procyanidin B1	578.5	Extrasynthese, France	104.7	8.1	128.1	11.4
Procyanidin B2	578.5	Extrasynthese, France	101.9	7.7	93.716	10.2
n-Propyl gallate	212.2	Sigma, USA	39.4	9	33.5544	8.8
Protocatechuic acid	154.1	Carl Roth GmbH, Germany	105.4	6.9	21.1	6.5
Pyrogallol	126.1	Riedel-de Haën, Germany	89.2	2.8	22.7	6.3
Quercetagetin	318.2	Carl Roth GmbH, Germany	85.2	9.2	90.2	10.9
Quercetin	338.3	Merck, Germany	110.2	7.9	125.831	5.8
Quercetin-3,7,3',4'-tetramethylether	358.4	Extrasynthese, France	58.2	3.9	65.0152	7.6
Quercitrin dihydrate	484.4	Carl Roth GmbH, Germany	45.2	7.1	11.4	4.7
(-)-Quinic acid	192.2	Sigma, Germany	106.9	3	98.2264	10.6
Resorcin	110.1	Riedel-de Haën, Germany	72.2	6.3	82.962	10.9
Resveratrol	228.3	Extrasynthese, France	79.8	6.5	103.428	11.4
Rhamnetin	316.3	Extrasynthese, France	94.7	8.1	119.058	15.4
Rosmarinic acid	360.3	Extrasynthese, France	98.8	2.9	120.269	19.2
Rutin	664.6	Merck, Germany	49.5	7.1	44.1301	7.3
D(-)-Salicin	286.3	Carl Roth GmbH, Germany	99.4	7.5	104.4	19.9
Salicylic acid	138.1	AnalaR, UK	78.2	4.9	69.1483	11.1
Silybin	482.4	Carl Roth GmbH, Germany	14.1	5.7	22.447	6.5
Sinapic acid	224.2	Fluka, Switzerland	51.4	5.1	21.9875	7.4
Sinigrin monohydrate	415.5	Carl Roth GmbH, Germany	99.2	7.1	47.64	8
Syringic acid	198.2	Sigma, USA	54.4	5.8	61.1264	9
Tannic acid	1791.2	Sigma, USA	82	9.2	41.7653	10.8
Camptothecin	348.4	Sigma, USA	100.4	5.6	87.722	9.9
(+)-Taxifolin	304.3	Extrasynthese, France	105.4	4.8	93.7417	10.4
Thymol	150.2	Riedel-de Haën, Germany	71.1	7.4	41.9535	8.3
3,4,5-Trimethoxybenzoic acid	212.2	Sigma, USA	28.8	5.3	34.0293	7.6
6-Hydroxy-2,5,7,8-tetramethylchroman-2-carboxylic acid	250.3	Aldrich, Germany	101.5	9.1	76.9	10.5
Umbelliferone	162.1	Sigma, USA	106.5	5	93.1498	9.5
Vanillic acid	168.2	Fluka, Switzerland	44.3	6.3	53.3561	6.9
Vanillin	152.2	Merck, Germany	71.7	9.4	47.9002	7.6
Butylated hydroxytoluene	220.4	Sigma, Germany	47.8	8.3	72.6083	9.4
4-Methylumbelliferone	175.1	Extrasynthese, France	105.6	8.8	90.9358	13.9
Isoscopoletin	192.2	Extrasynthese, France	99.4	7.3	120.629	15.3
Fraxetin	208.2	Extrasynthese, France	95.4	5.4	103.64	11.7
Fraxidin	222.2	Extrasynthese, France	104.3	5.8	77.7839	10.7
Daphnetin	178.4	Extrasynthese, France	103.7	7	90.6257	9.9
Daphnetin-7-methylether	192.2	Extrasynthese, France	89.9	4.3	105.593	9.5
Scopoletin	192.2	Sigma, USA	95.4	5.7	81.8746	10.9
Umbelliferone	162.1	Sigma, USA	100.7	5	78.3608	10.5
6-Methylcoumarin	160.7	Extrasynthese, France	106.5	11.7	83.6005	12.6
4-Hydroxycoumarin	162.1	Extrasynthese, France	95.4	6.5	100.213	9.5
3-(a-Acetonylbenzyl)-4-hydroxycoumarin	308.3	Sigma, USA	57.2	3.7	79.4743	9.4
6-Methoxy-4-methylcoumarin	190.2	Extrasynthese, France	85.4	6.5	66.552	7
7-Methoxy-4-methylcoumarin	190.2	Extrasynthese, France	100.6	7.7	72.2218	12.8
5,7-Dihydroxy-4-methylcoumarin	193.2	Extrasynthese, France	78.1	7	66.7419	14.9
6,7-Dihydroxy-4-methylcoumarin	193.2	Extrasynthese, France	95.4	6.8	131.059	13.3
Herniarin	176.2	Extrasynthese, France	102.2	6.2	53.2039	8
6,8-Dibromocoumarin carboxylic acid	348	Avocado, UK	100.1	5.8	67.4245	9.4
Esculetin	178.2	Fluka, Switzerland	89.2	6.9	103.575	6.9
Esculin sesquihydrate	367.3	Fluka, Switzerland	102.6	5.8	95.013	9.5
Citropten	206.2	Extrasynthese, France	106.4	7.5	67.4257	10.8
Xanthotoxin	216.3	Extrasynthese, France	95.4	3.7	86.7361	8
Coumarin 106	281.4	Acros, USA	91.5	5.2	82.0994	5
Coumarin 153	302.2	Acros, USA	96.1	6.8	52.5977	12.6
Pharmaceutical compounds (PC)
Chemical name	MW	Supplier	% left	SD	% left	SD
Acetaminophen [paracetamol]	151.2	Oriola, Finland	85.2	9.2	63.5082	7.6
Acetanilide	135.6	YA, Finland	92.2	10	57.3063	9.3
Acetazolamide	222.3	YA, Finland	102.2	8.2	71.305	8.9
Acetyleneurea [acetylene carbamide]	142.1	Halewood chemicals, UK	105.4	8.4	55.1968	9.4
N-Acetylsulfanilamide	214.2	The Boots Company, UK	104.1	5.9	63.2213	10.5
Acetylsulfisoxazole	309.4	YA, Finland	82.1	9.1	40.3655	9.2
L-3-(3,4-Dihydroxyphenyl)alanine [L-DOPA]	197.2	Fluka, Germany	54.8	5.4	43.631	7.9
Allobarbital	208.2	YA, Finland	121.1	3.7	45.5802	8.2
Allylestrenol [17-a-allylestr-4-en-17-beta-oll]	300.5	Organon, Finland	49.4	6.9	37.1787	7
p-Aminobenzoic acid	137.1	Porin apteekki, Finland	105.4	8	56.485	8.5
4-Aminoantipyrine [ampyrone]	203.2	Fluka, Germany	89.2	11.4	51.6331	8.8
Amydricaine hydrochloride	314.9	Aurum, USA	74.3	6.3	43.3694	9.1
4-a-Androstane	260.5	Steraloids Inc., USA	85.5	8.6	53.0141	10.2
Antazoline hydrochloride	300.8	Merck, USA	100.5	7.1	38.7229	9
Antipyrine	188.2	Aldrich, USA	102.6	5.8	60.0543	10.6
Arecoline hydrobromide	236.1	Merck, USA	101.1	7.5	83.6246	15.9
Atenolol	266.3	Tamro, Finland	65.2	8.5	44.2498	9.3
Atropine methyl nitrate	366.5	Merck, USA	61.7	7.2	46.8403	8.8
Bamethan	209.3	Merck, USA	96.9	5.1	67.1141	12.5
Barbital	184.2	Boehringer Ingelheim, Germany	106.1	4.8	64.7008	9.5
Barbituric acid	128.1	Aldrich, USA	88.4	7.7	48.8007	9.3
Benzalkonium chloride	424.2	YA, Finland	-0.5	6.8	0.0294207	0.3
Benzocaine	165.2	YA, Finland	85.4	4.7	43.4369	9
Bromhexine hydrochloride	412.6	Boehringer Ingelheim, Germany	82.8	5.8	64.8189	11.9
Buclosamide	227.7	Merck, USA	100.6	6	49.6389	8.2
Bunitrolol	248.3	Boehringer Ingelheim, Germany	58.9	3.1	40.7255	9.2
I-Bunolol	291.4	Warner-Lambert, USA	105.4	5.2	59.638	9.6
Busulfan	246.3	YA, Finland	100.5	6.9	51.8018	8.6
Butethal	212.2	YA, Finland	78.2	1.9	45.2202	10.6
Butidrine	247.4	Simes, Italy	89.2	8.4	73.0705	6
Butyl 4-Aminobenzoate	193.3	Merck, USA	102.7	3	76.6164	8.7
p-Butylaminobenzoyldimethylaminoethanol	300.8	Hoechstag, Germany	77.1	5.3	45.3597	5
1-Butyl-3-sulfanilylurea [carbutamide]	271.4	Orion, Finland	67.5	7.5	83.8981	11.9
Cainopan, p-Butylaminobenzoyldimethylaminoethanol	300.8	YA, Finland	82.2	8.2	63.8344	9.9
Calcium pantothenate	476.5	YA, Finland	89.1	9.4	67.9428	10.5
DL-Camphon, Campher (synth.)	152.2	Merck, USA	105.4	5.5	83.8957	13
Carbamazepine	236.3	YA, Finland	100.2	7.3	57.2378	10.5
Carteolol hydrochloride	328.9	Orion, Finland	78.1	9	67.2	11.8
Cetrimonium bromide	364.5	YA, Finland	80.5	4.7	75.0225	10.9
Chloramphenicol	323.1	Sigma, USA	53.2	7.2	73.8446	10.2
Chlordiazepoxide	299.8	Sigma, USA	100.6	9.4	54.3026	9.2
Chlorobutanol	177.5	Tamro, Finland	95.1	8.4	84.189	10.6
4'-Chlorodiazepam	320	YA, Finland	105.5	5.1	63.9906	9.9
Chloroquine	515.9	Sigma, USA	104.4	4.3	12.2	7.1
Chlorothiazide	295.7	Byron Chemical Company, USA	82.1	3	90.2903	10.9
Chlorpromazine hydrochloride	318.9	Sigma, USA	105.4	7.1	18.899	7.5
Chlorprothixene hydrochloride	352.4	Orion, Finland	78.2	4.3	90.2662	13.5
Cinchophen	249.3	Sigma, USA	51.2	2.7	65.147	9.3
Clioquinol	305.5	Oriola, Finland	32.7	4.1	71.9238	9.9
Clopenthixol dihydrochloride	473.9	Lundbeck, Denmark	40.1	3.9	55.1944	6.5
Clorprenaline hydrochloride	213.7	Lilly, USA	102.2	4	63.6877	10.8
Cornecaine	317.2	YA, Finland	80.5	5.3	77.2871	15.7
Cyclamic acid	179.2	Merck, USA	107.5	4.3	74.9216	18.2
Deoxycholic acid	392.6	Merck, USA	100.8	4.7	86.5016	15.4
Selegiline hydrochloride	223.8	Orion, Finland	43.1	5.1	57.0239	12.6
Dequalinium chloride	527.6	Oriola, Finland	39.4	3.7	62.4833	18.4
Desalkylflurazepam	288.7	YA, Finland	74.3	5.6	68.5149	8.4
Dexbrompheniramine maleate	435.3	YA, Finland	100.4	5.8	69.5559	15.4
Dexchlorpheniramine maleate	435.3	Tamro, Finland	51.7	7.2	68.0813	11.3
Diazepam	284.8	Suomen rohdosyhtymä, Finland	84	3.7	73.6445	17.4
Dibucaine hydrochloride	379.9	Ciba, Finland	100.5	4.5	77.8232	10.2
Dichloroisoproterenol hydrochloride	284.6	Lilly, USA	69.2	6.5	49.5901	7.5
Dicumarol	336.3	Merck	43	5.8	65.6159	11.4
Diethylpropion hydrochloride	241.8	Supro Troponwerke Köln, Germany	29.6	4.1	47.0962	9.9
Digoxin	780.9	Merck, USA	94.3	7	141.85	16.5
1,8-Dihydroxyanthrone	226.2	YA, Finland	40.9	6.2	27.1763	5.3
Diphenhydramine hydrochloride	291.9	Maunulan apteekki, Finland	194.3	6.3	41.0494	7.3
Diphenylhydantoin [phenytoin]	252.3	YA, Finland	78.1	3.9	66.3081	11.7
Metamizol sodium	351.4	YA, Finland	105.1	8.3	85.9846	10.6
Doxepin hydrochloride	279.4	YA, Finland	87.2	5.6	21.6289	7.6
Dulcin [p-phenetylurea]	180.2	Sigma, USA	70.2	6.1	103.275	9.6
Emetine dihydrochloride	553.6	YA, Finland	80.9	8	63.0682	10.5
Ethamivan	223.3	Pharmacia Uppsala, Sweden	43.1	7.3	85.482	9.9
Ethopropazine hydrochloride	345	M & B, UK	59.8	7.1	20.0548	6.5
Ethyl 4-hydroxybenzoate	166.2	YA, Finland	94.4	4.3	127.816	15.7
Ethylnorepinephrine	197.2	Hoechst, Germany	104.3	5.2	126.836	19.5
17 -a-ethynylestradiol	296.4	Leiras, Finland	59.8	5.7	11.6721	9.5
Etilefrin	181.2	Böhringer & Sohn, Germany	87.1	5	116.784	6
Fenoprofen calcium salt	522.6	Lilly, USA	78.3	6.1	87.5682	9.6
Fenoterol hydrobromide	303.4	Boehringer Ingelheim, Germany	88.4	4.7	106.578	7.4
Cis(Z)-Flupentixol dihydrochloride	475.4	Lundbeck, Denmark	102.7	8.1	92.6035	9.6
2-Amino-5-chloro-2'-fluorobenzophenone	249.7	YA, Finland	82.2	10.1	167.438	21.6
Fluphenatzinemaleate	437.5	Sovirel, France	104.3	7.4	98.9348	12.7
Folic acid	441.4	Sigma, USA	78.1	5.7	100	13.7
Guaifenesin	198.2	YA, Finland	82.7	8.1	124.465	7
Hexobarbital	236.3	Merck, USA	98.2	8	121.273	14.1
Hexoprenaline	420.5	Linz, Austria	79.1	7.2	124.923	15.5
Homatropine hydrobromide	356.3	YA, Finland	100.4	8.2	118.529	9.9
Homotaurine	139.2	YA, Finland	89.2	7.9	118.731	8.9
Hydrochlorothiazide	297.7	Orion, Finland	70.2	5.8	121.225	15.3
Hydrocortisone acetate	404.5	Roussel Uclaf, France	72.1	4.8	116.825	18.4
Hydroxychloroquine sulfate	434	The New Asiatic Pharmaceutical, China	100.1	6	128.899	9.9
p-Hydroxyephedrine	181.2	Hoechst, Germany	100.6	7.2	94.4057	10.5
N-Hydroxyethylpromethazine chloride	365	Orion, Finland	85.9	3.8	102.235	8.4
Hydroxyzine hydrochloride	447.8	UCB, Belgium	100.5	5.0	98.3297	9.6
Ibufenac	192.3	The Boots Company, UK	78.9	9.3	102.178	13.6
Ibuprofen	206.3	YA, Finland	100.5	5.5	92.7777	16.4
Inositol	180.2	YA, Finland	89.5	4.9	105.994	9.5
Isoetharine	239.3	YA, Finland	100.4	6.1	90.7028	10.5
(+/-)-Isoproterenol hemisulfate salt	520.6	Sigma, USA	105.1	8.4	110.859	8.9
Isoproterenol hydrochloride [isoprenaline hydrochloride]	247.8	Winthrop, USA	99.3	5.4	112.534	11.7
(S)-(+)-Ketoprofen [(S)-2-(3-Benzoylphenyl)-propionic acid]	254.3	Sigma, USA	99.6	3.9	103.214	8.9
Labetalol hydrochloride	364.9	YA, Finland	100.1	10.5	72.5129	10.2
Lorazepam	321.2	Sigma, USA	104.9	6.8	98.1838	11.9
Medazepam	270.8	YA, Finland	101.7	7	87.5174	5.9
Mefenamic acid	241.3	Parke-Davis, USA	99.4	8.2	103.486	9.7
Menadione [2-Methyl-1,4-naphtoquinone]	172.2	Fluka, Germany	31.1	5	28.257	6.5
Mephenesin [3-o(tolyloxy)1,2-propanediol]	182.2	Sigma, USA	54.1	8.9	79.1894	10.8
Mephentermine sulfate	424.7	Wyeth laboratories, USA	70.1	4.7	81.8431	14.4
Mepivacaine hydrochloride	282.9	AB Bofors, Sweden	62.2	3	74.9384	10.5
Mesoridazine besylate	544.8	Sandoz, Switzerland	100.5	7.4	93.8222	11.6
Metaraminol bitartrate salt	317.3	Merck & Dohme, USA	69.1	5.6	96.4524	8.9
Methdilazine	296.4	YA, Finland	19.1	7.1	22.5356	10.6
Methoxamine hydrochloride	247.7	Burroughs Wellcome, USA	48.2	4.8	98.3862	9.5
Methylatropine bromide	384.3	YA, Finland	54.9	6.1	70.8847	8.8
L-Methyldopa	211.2	Orion, Finland	70.2	8.2	99.1322	10
Methyl p-hydroxybenzoate	152.2	YA, Finland	100.4	5.6	69.346	7.2
Metipranolol	309.4	Medica, Finland	100.5	7.5	46.1727	10.4
Metronidazole	171.2	Medipolar, Finland	89.2	4.9	69.2415	6.5
Metoprolol tartrate	684.8	Hässle, Sweden	78.2	5.3	65.7262	8.9
Nadolol	309.4	Squibb, USA	63.3	5.8	60.4632	6
Nadoxolol	260.3	YA, Finland	69.2	5.6	20.7737	8.4
Nalidixic acid	232.2	YA, Finland	100.4	9.4	80.4104	8.4
Naproxen	230.3	ICN Biomedicals, USA	89.2	4.9	92.7162	6.9
Narceine	445.5	Aldrich, USA	70.7	5.8	118.332	5.2
Neomycin sulfate	614.7	YA, Finland	100.4	7	99.5581	15.4
Nicotinamide	122.1	YA, Finland	99.1	4.8	116.878	16.5
Nitrazepam	281.3	YA, Finland	98.8	5.1	45.9678	8.2
Nitrofurantoin	238.2	Fluka, Germany	60.9	8	58.9204	6.9
Nitrofurazone	198.1	Leiras, Finland	102.1	8.9	83.7128	9.4
Nordefrin hydrochloride	219.7	Hoechst, Germany	104.2	4.7	117.995	8.5
Norethindrone	298.4	Leiras, Finland	97.1	3.6	107.778	7.8
Norfenefrine	153.2	YA, Finland	96.6	8.6	126.275	10.8
Nortriptyline hydrochloride	299.9	Sigma, USA	29.1	7.1	5.33777	4.3
Noscapine	413.4	Oriola, Finland	78.4	4.2	103.451	15.4
Octopamine hydrochloride	189.7	Tropenwerke Köln, Germany	88.4	7.4	102.081	9.3
Opipramol	363.5	Ciba-Geigy, Switzerland	101.5	9.3	27.5272	5.4
Ouabain	584.6	Porin apteekki, Finland	89.2	9.1	90.856	12.2
Oxazepam	286.7	YA, Finland	80.3	3.8	79.0926	10.5
Oxprenolol hydrochloride	301.9	Ciba-Geigy, Switzerland	84.3	7.3	92.3867	11.1
Oxyphenbutazone	324.4	Orion, Finland	100.4	7.4	84.8297	11
1-(4-Oxyphenyl)-1-oxy-2-ethylamonoethane	182.2	Sigma, USA	105.4	5.2	86.9349	10.5
Pantothenic acid, calcium salt monohydrate	476.5	YA, Finland	106.1	5.1	93.0737	15.4
Papaverine	339.4	YA, Finland	78.2	5.8	99.2932	13.2
Penbutolol	291.4	Hoechst, Germany	39.4	8.4	44.96	15.4
Pentobarbital	226.1	Sigma, USA	104.3	6.1	70.5279	18.2
Perphenazine	404	Merck, USA	88.1	5.8	10.602	8.9
Phenacetin	179.2	YA, Finland	100.8	7.3	71.8461	10.2
Phenacetin	179.2	YA, Finland	94.3	9.4	80.6081	8.9
Phenazone c. coffeincitrat gran.	411.2	YA, Finland	80.9	6.8	83.9682	9.4
Phenobarbital	232.2	YA, Finland	43.2	5.9	58.5629	10.5
Phenylbutazone	308.4	Orion, Finland	100.5	7.1	96.6736	9.1
L-Phenylephrine hydrochloride	203.7	YA, Finland	104.1	4.9	85.0788	11.9
Phenyl salicylate	214.2	YA, Finland	94.3	8.2	118.225	8.4
Pholedrine sulfate	428.6	Knoll AG, Germany	81.5	6.8	92.8031	10.8
Phthalylsulfacetamide	362.4	Abic Ltd., Israel	85.4	5.1	110.596	9.5
Phthalylsulfathiazole	403.4	Arkadia, Finland	100.5	7.3	113.738	9.5
Pindolol	248.3	Orion, Finland	72.1	6.3	86.24	10.5
p-Phenoxyethanolisopropylaminosulfate	452.3	YA, Finland	39.2	6.7	99.0464	13.7
Practolol	266.4	Orion, Finland	61.5	4.1	117.322	12.8
Prednisolone	360.4	Oriola, Finland	84.3	6.3	104.224	12
Prednisone	358.4	Oriola, Finland	54.4	8.1	84.961	10.8
Primidone	218.3	Maunulan apteekki, Finland	41.6	5.1	127.099	17.3
Procainamide hydrochloride	271.8	YA, Finland	100.4	5.2	89.0111	8.2
Procaine hydrochloride	272.8	Merck, USA	84.3	7.2	105.385	7.5
Prochlorperazine	373.9	May & Baker, UK	71.9	4.8	51.3828	10.7
Promethazine hydrochloride	320.9	Rhodia Pharma, UK	39.2	7.2	48.8193	11.5
Pronethalol	265.8	ICI, USA	29.9	5.1	62.8934	15.4
Propantheline bromide	448.4	Star, Finland	104.2	4.9	77.0236	19.2
2-(3-Carboxyphenyl)propionic acid	74.1	British Pharmacopeia Commission Laboratory, UK	94.3	6.1	105.722	12.3
Propranol tropeoline	237.9	YA, Finland	100.5	4.8	95.8602	9
Propranolol hydrochloride	295.8	Medipolar, Finland	105.4	5.5	73.9945	11.7
Propyphenazone	230.3	YA, Finland	81.1	6.4	50.9156	9.5
Prothipendyl hydrochloride	321.9	Draco, Finland	11.2	3.7	7.3923	10.6
Protokylol hydrochloride	367.8	Tropon, Germany	85.4	6.4	128.399	11.8
Pyridoxine hydrochloride	205.6	Oriola, Finland	71.1	3.9	100.927	10.9
Pyrilamine maleate	401.5	Rhodia Pharma, UK	85.4	4.7	73.659	8
Quinidine polygalacturonate	536.6	Orion, Finland	40.3	6.1	67.4352	10.5
Resorcinol	110.1	YA, Finland	102.9	4.8	67.0986	11.7
Riboflavin	376.4	Oriola, Finland	63.1	4	43.0916	9.5
Saccharin sodium	205.2	Fluka, Germany	81.5	9.2	104.993	8
Salbutamol	239.3	Huhtamäki Oy, Pharmaceuticals, Finland	78.4	6.4	151.374	9.9
(+/-) Salbutamol sulfate	576.7	Leiras, Finland	71.9	6.8	104.96	12.5
Salicylamide	137.1	Fluka, Germany	38.2	7.1	126.203	8.5
Salicylsalicylic acid	258.2	Boehringer Ingelheim, Germany	88.9	10.2	127.367	9.6
Santonin	246.3	YA, Finland	101.9	4.3	99.9448	10.5
Phenobarbital sodium	254.2	Geigy, Switzerland	70.8	6.9	88.0986	11.5
Sotalol hydrochloride	308.9	Fluka, Germany	80.1	5	100.535	11.8
Sulfacetamide	214.2	Katwijk, Netherlands	50.4	2.9	100.783	9.4
Sulfadiazine	250.3	YA, Finland	81.2	4.7	107.719	11.6
Sulfadimethoxine	310.3	YA, Finland	39.1	4.1	102.356	12.7
Sulfaethidole	284.4	Smith Kline & Fench Labs., USA	100.4	4.4	106.417	15.4
Sulfaguanidine	214.2	Sigma, USA	62.1	7.3	63.5343	18.5
Sulfamerazine	264.3	YA, Finland	91.1	4.8	83.8059	10.5
Sulfameter	280.3	Orion, Finland	79.2	6.5	98.9848	9.5
Sulfamethazine	278.3	Oriola, Finland	100.5	11.8	91.6684	9.5
Sulfamethizole	270.3	Leiras, Finland	79.1	5.2	100.408	13.4
Sulfamethoxazole	253.3	YA, Finland	100.5	7.3	77.5103	7.4
Sulfamethoxypyridazine	280.3	YA, Finland	82	6.4	110.031	12.7
Sulfamethylthiadiazole	270.3	Ved Berlin, Germany	92.1	7.5	89.6325	10.6
Sulfamoxole	267.3	Aldrich, USA	80.2	6.2	83.0059	9.4
Sulfanilamide	172.2	Imperial Chem. Ind. Limited, UK	100.5	10.5	64.1583	7.8
N-Sulfanilyl-3,4-xylamide	304.4	YA, Finland	100.7	6.3	72.0387	10.5
Sulfaperine	264.3	Medica, Finland	100.8	4.8	127.815	16.5
Sulfapyridine	249.3	Merck, USA	79.9	5.2	94.9598	11.7
Sulfathiazole	255.3	Fluka, Germany	78.5	7.8	138.148	14.3
Sulfisoxazole	267.3	Sigma, USA	104.5	5.6	91.4463	12.1
Sulfonmethane	228.3	Sigma, USA	102.7	7.3	86.626	16.5
Talinolol	363.5	Arzneimittelwerk, Germany	91.8	4.8	76.8856	8.5
Temazepam	300.7	YA, Finland	79.5	7.4	91.4596	10
Terbutaline hemisulfate salt	548.7	AB Draco/Astra, Sweden	87.2	5.8	97.5466	21.6
Tetracaine hydrochloride	300.8	Merck, USA	71.1	6.3	102.807	15.6
Theobromine	180.2	YA, Finland	70.2	5.8	112.094	9.5
Theophylline	180.2	YA, Finland	100.4	6	87.8061	13.5
7-(2,3-Dihydroxypropyl)theophylline	254.2	YA, Finland	54.3	9.2	100.073	10.5
7- (β-Hydroxypropyl)theophylline	238.2	YA, Finland	70.9	5.1	125.455	16.5
Thiamine mononitrate	327.4	Sigma, USA	85	7.2	95.2264	9.6
Thiethylperazine	399.6	Sandoz, Switzerland	101.1	4.6	26.5266	5.6
1,3-Diethyl-2-thiobarbituric acid [thiobarbital]	200.3	Merck, USA	89.2	5.5	75.6989	8.6
Thioridazine	370.6	Sandoz, Switzerland	95.4	9.2	11.5965	12.3
6-Propyl-2-thiouracil	170.2	Sigma, USA	100.5	8.8	80.9658	9.5
Timolol maleate	432.5	Orion, Finland	100.6	4	129.101	11.1
Tinidazole	247.3	Orion, Finland	100.5	5.9	104.114	15.4
Tinopal	961	YA, Finland	101.1	12	75.2722	12.2
(+)-a-Tocopherol acid succinate	530.8	Sigma, USA	62.2	7.2	75.2722	15.4
Tolazoline, hydrochloride	196.7	Sigma, USA	102.1	5.1	75.9922	8.9
Tolbutamide	270.3	Novo, Denmark	100.9	5.3	80.2124	11.2
Tolfenamic acid	261.7	TYKS Apteekki, Finland	108.2	6.4	80.1124	18.4
Tranylcypromine sulfate	133.9	SK&F, Germany	94.4	5.1	94.7998	7.6
Triamterene	253.3	Farmos-Yhtymä Oy, Finland	71.2	5	92.9729	9.9
Triazolam	343.2	Sigma, USA	40.1	5.7	76.4915	9.4
Trimeprazine tartrate	747.1	Sigma, USA	100.5	5.8	120.399	5.8
Sulfaninyl urea hydrate	215.2	YA, Finland	92.8	7.9	120.176	6.1
Xylometazoline	244.4	YA, Finland	78.2	6	94.2344	8.6
aValues represent surviving fractions (remaining precentages of Semliki Forest virus (SFV) replication).

## Sheet: draft1
SUPPLEMENTARY TABLE 1. Primary screening of chemical libraries. Compounds were tested at 50 µM concentration. See Materials and Methods of the article for experimental details.
Natural compounds (NC)					SFV replicationa
ID	Chemical name	MW	Supplier		% left
NC-001	Acacetin	284.3	Carl Roth GmbH, Germany	Germany	78.0803	1
NC-002	Alphanaphthoflavone	272.9	Acros, USA	USA	14.5759	2
NC-003	Apigenin	270.2	Fluka, Switzerland	Switzerland	17.9762	3
NC-004	L-ascorbic acid	176.1	Sigma, Germany	Germany	81.4	4
NC-005	Benzoic acid	122.1	Merck, Germany	Germany	71.5895	5
NC-006	3-Benzoylbenzo(F)coumarin	300.3	Acros, USA	USA	39.9324	6
NC-007	3-(2-Benzoxazolyl)umbelliferone	279.3	Fluka, Switzerland	Switzerland	21.0109	7
NC-008	Bergapten, 5-Methoxypsoralen	216.2	Carl Roth GmbH, Germany	Germany	46.7786	8
NC-009	Butylated hydroxyanisole	180.2	Sigma, Germany	Germany	66.7502	9
NC-010	Caffeic acid	180.2	Sigma, USA	USA	98.6575	10
NC-011	(+)-Catechin	290.3	Sigma, USA	USA	64.471	11
NC-012	Catechol	110.1	Sigma, Germany	Germany	58.3504	12
NC-013	Chrysin	254.3	Extrasynthese, France	France	18.1158	13
NC-014	o-Coumaric acid	164.2	Sigma, USA	USA	77.5647	14
NC-015	Coumarin 102	255.3	Acros, USA	USA	34.6	15
NC-016	Coumarin 30	347.4	ICN, USA	USA	12.2985	16
NC-017	Coumarin 7	333.4	Acros, USA	USA	37.2835	17
NC-018	Coumarin	146.2	Merck, Germany		68.7887	18
NC-019	Cyanidin chloride	322.7	Carl Roth GmbH, Germany	Germany	24.4798	19
NC-020	Daidzein	254.3	Extrasynthese, France	France	76.5642	20
NC-021	Daphnetin	178.2	Extrasynthese, France	France	81.7161	21
NC-022	7-Diethylamino-3-thenoylcoumarin	327.4	Acros, USA	USA	15.6193	22
NC-023	2,3-Dihydroxybenzoic acid	154.1	Fluka, Switzerland	Switzerland	93.0828	23
NC-024	2,5-Dihydroxybenzoic acid	154.1	Fluka, Switzerland	Switzerland	127.8	24
NC-025	2,6-Dihydroxybenzoic acid	154.1	Fluka, Switzerland	Switzerland	118.677	25
NC-026	3,4-Dihydroxybenzoic acid	154.1	Fluka, Switzerland	Switzerland	124.456	26
NC-027	3,5-Dihydroxybenzoic acid	154.1	Fluka, Switzerland	Switzerland	6.92077	27
NC-029	2,5-Dimethylphenol	122.2	Fluka, Switzerland	Switzerland	84.5573	28
NC-032	5-Dimethylaminonaphthalene-1-sulfonylchloride	269.8	Fluka, Switzerland	Switzerland	4.55744	29
NC-033	Ellagic acid	302.2	Sigma,USA	USA	64.9019	30
NC-034	(-)-Epicatechin	290.3	Sigma,USA	USA	97.0854	31
NC-035	(-)-Epicatechin gallate	442.4	Extrasynthese, France	France	94.8308	32
NC-036	(-)-Epigallocatechin	306.3	Extrasynthese, France	France	101.863	33
NC-037	(-)-Epigallocatechin gallate	458.4	Extrasynthese, France	France	155.315	34
NC-038	Ethoxyquin	217.3	Sigma, USA	USA	96.356	35
NC-039	Ferulic acid	194.2	Extrasynthese, France	France	63.443	36
NC-040	Flavone	222.3	Carl Roth GmbH, Germany	Germany	52.2255	37
NC-041	Gallic acid	170.1	Sigma, USA	USA	148.843	38
NC-042	Genistein	270.2	Extrasynthese, France	France	45.6229	39
NC-043	Gitoxigenin	390.5	Carl Roth GmbH, Germany	Germany	102.726	40
NC-044	Gossypin	648.5	Extrasynthese, France	France	105.826	41
NC-045	Hamamelitannin	484.4	Extrasynthese, France	France	14.6742	42
NC-046	Hesperidin	610.6	Extrasynthese, France	France	77.6716	43
NC-047	2-Hydroxyacetophenone	136.2	Fluka, Switzerland	Switzerland	129.733	44
NC-048	3-Hydroxyacetophenone	136.2	Fluka, Switzerland	Switzerland	125.8	45
NC-049	4-Hydroxyacetophenone	136.2	Fluka, Switzerland	Switzerland	29.3842	46
NC-050	2-Hydroxyphenylacetic acid	152.2	Fluka, Switzerland	Switzerland	7.25038	47
NC-051	3-hydroxyphenylacetic acid	152.2	Fluka, Switzerland	Switzerland	110.786	48
NC-052	4-Hydroxyphenylacetic acid	152.2	Fluka, Switzerland	Switzerland	103.59	49
NC-053	Hydroquinone	110.1	Fluka, Switzerland	Switzerland	16.8976	50
NC-054	Isopropyl gallate	212.2	Lancaster, UK	England	123.96	51
NC-055	2,4-Dihydroxylbenzoic acid	154.1	Fluka, Switzerland	Switzerland	32.0629	52
NC-056	Isorhamnetin	316.3	Extrasynthese, France	France	28.9195	53
NC-057	Kaempferol	286.3	Extrasynthese, France	France	2.93425	54
NC-058	Khellin	260.2	Carl Roth GmbH, Germany	Germany	120.553	55
NC-059	Lauryl gallate	338.5	Fluka, Switzerland	Switzerland	12.3181	56
NC-060	Leucocyanidin	306.3	Carl Roth GmbH, Germany	Germany	136.327	57
NC-061	Luteolin	286.3	Extrasynthese, France	France	71.2651	58
NC-062	Luteolin-7-glucoside	448.4	Extrasynthese, France	France	17.7701	59
NC-063	Malvin chloride	691	Extrasynthese, France	France	15.4363	60
NC-064	Methyl gallate	184.2	Fluka, Switzerland	Switzerland	67.8305	61
NC-065	Methylumbelliferone	175.1	Dr. Theodor Schuchardt, G.m.g.H., Chem. Fabrik, Germany		12.0459	62
NC-066	2'-Methoxy-a-naphthoflavone	302.3	ICC, USA		45.7928	63
NC-067	Morin dihydrate	338.3	Carl Roth GmbH, Germany	Germany	82.9207	64
NC-068	Myricetin	318.3	Extrasynthese, France	France	1.96414	65
NC-069	Naringenin	272.3	Sigma, Germany	Germany	-0.0735814	66
NC-070	4-Methyl pyrocatechol	124.1	Merck, Germany	Germany	111.1	67
NC-071	Nordihydroguaiaretic acid	302.4	Fluka, Switzerland	Switzerland	35.5647	68
NC-072	Octyl gallate	282.3	Fluka, Switzerland	Switzerland	134.446	69
NC-073	Phthalic acid	166.1	Merck, Germany	Darmstadt	143.706	70
NC-074	Procyanidin B1	578.5	Extrasynthese, France	France	128.1	71
NC-075	Procyanidin B2	578.5	Extrasynthese, France	France	93.716	72
NC-076	n-Propyl gallate	212.2	Sigma, USA	USA	33.5544	73
NC-077	Protocatechuic acid	154.1	Carl Roth GmbH, Germany	Germany	21.1	74
NC-078	Pyrogallol	126.1	Riedel-de Haën, Germany	Germany	22.7	75
NC-079	Quercetagetin	318.2	Carl Roth GmbH, Germany	Germany	90.2	76
NC-080	Quercetin	338.3	Merck, Germany	Darmstadt	125.831	77
NC-081	Quercetin-3,7,3',4'-tetramethylether	358.4	Extrasynthese, France	France	65.0152	78
NC-083	Quercitrin dihydrate	484.4	Carl Roth GmbH, Germany	Germany	11.4	79
NC-084	(-)-Quinic acid	192.2	Sigma, Germany	Germany	98.2264	80
NC-085	Resorcin	110.1	Riedel-de Haën, Germany	Germany	82.962	81
NC-086	Resveratrol	228.3	Extrasynthese, France	France	103.428	82
NC-087	Rhamnetin	316.3	Extrasynthese, France	France	119.058	83
NC-088	Rosmarinic acid	360.3	Extrasynthese, France	France	120.269	84
NC-090	Rutin	664.6	Merck, Germany	Germany	44.1301	85
NC-091	D(-)-Salicin	286.3	Carl Roth GmbH, Germany	Germany	104.4	86
NC-092	Salicylic acid	138.1	AnalaR, UK	England	69.1483	87
NC-093	Silybin	482.4	Carl Roth GmbH, Germany	Germany	22.447	88
NC-095	Sinapic acid	224.2	Fluka, Switzerland	Switzerland	21.9875	89
NC-096	Sinigrin monohydrate	415.5	Carl Roth GmbH, Germany	Germany	47.64	90
NC-097	Syringic acid	198.2	Sigma, USA	USA	61.1264	91
NC-098	Tannic acid	1791.2	Sigma, USA	USA	41.7653	92
NC-099	Camptothecin	348.4	Sigma, USA	USA	87.722	93
NC-100	(+)-Taxifolin	304.3	Extrasynthese, France	France	93.7417	94
NC-101	Thymol	150.2	Riedel-de Haën, Germany	Germany	41.9535	95
NC-102	3,4,5-Trimethoxybenzoic acid	212.2	Sigma, USA	USA	34.0293	96
NC-103	6-Hydroxy-2,5,7,8-tetramethylchroman-2-carboxylic acid	250.3	Aldrich, Germany	Germany	76.9	97
NC-104	Umbelliferone	162.1	Sigma, USA	USA	93.1498	98
NC-105	Vanillic acid	168.2	Fluka, Switzerland	Switzerland	53.3561	99
NC-106	Vanillin	152.2	Merck, Germany	Germany	47.9002	100
NC-107	Butylated hydroxytoluene	220.4	Sigma, Germany	Germany	72.6083	101
NC-108	4-Methylumbelliferone	175.1	Extrasynthese, France	France	90.9358	102
NC-109	Isoscopoletin	192.2	Extrasynthese, France	France	120.629	103
NC-110	Fraxetin	208.2	Extrasynthese, France	France	103.64	104
NC-111	Fraxidin	222.2	Extrasynthese, France	France	77.7839	105
NC-112	Daphnetin	178.4	Extrasynthese, France	France	90.6257	106
NC-113	Daphnetin-7-methylether	192.2	Extrasynthese, France	France	105.593	107
NC-114	Scopoletin	192.2	Sigma, USA	USA	81.8746	108
NC-115	Umbelliferone	162.1	Sigma, USA	USA	78.3608	109
NC-116	6-Methylcoumarin	160.7	Extrasynthese, France	France	83.6005	110
NC-117	4-Hydroxycoumarin	162.1	Extrasynthese, France	France	100.213	111
NC-118	3-(a-Acetonylbenzyl)-4-hydroxycoumarin	308.3	Sigma, USA	USA	79.4743	112
NC-119	6-Methoxy-4-methylcoumarin	190.2	Extrasynthese, France	France	66.552	113
NC-120	7-Methoxy-4-methylcoumarin	190.2	Extrasynthese, France	France	72.2218	114
NC-122	5,7-Dihydroxy-4-methylcoumarin	193.2	Extrasynthese, France	France	66.7419	115
NC-123	6,7-Dihydroxy-4-methylcoumarin	193.2	Extrasynthese, France	France	131.059	116
NC-124	Herniarin	176.2	Extrasynthese, France	France	53.2039	117
NC-125	6,8-Dibromocoumarin carboxylic acid	348	Avocado, UK	UK	67.4245	118
NC-126	Esculetin	178.2	Fluka, Switzerland	Switzerland	103.575	119
NC-127	Esculin sesquihydrate	367.3	Fluka, Switzerland	Switzerland	95.013	120
NC-128	Citropten	206.2	Extrasynthese, France	France	67.4257	121
NC-129	Xanthotoxin	216.3	Extrasynthese, France	France	86.7361	122
NC-130	Coumarin 106	281.4	Acros, USA	USA	82.0994	123
NC-131	Coumarin 153	302.2	Acros, USA	USA	52.5977	124
Pharmaceutical compounds
ID	Chemical name	MW	Supplier		% left
PC001-	Acetaminophen [paracetamol]	151.2	Oriola, Finland	Finland	63.5082	1
PC-002	Acetanilide	135.6	YA, Finland	Finland	57.3063	2
PC-003	Acetazolamide	222.3	YA, Finland	Finland	71.305	3
PC-004	Acetyleneurea [acetylene carbamide]	142.1	Halewood chemicals, UK	UK	55.1968	4
PC-005	N-Acetylsulfanilamide	214.2	The Boots Company, UK	UK	63.2213	5
PC-006	Acetylsulfisoxazole	309.4	YA, Finland	Finland	40.3655	6
PC-007	L-3-(3,4-Dihydroxyphenyl)alanine [L-DOPA]	197.2	Fluka, Germany	Germany	43.631	7
PC-008	Allobarbital	208.2	YA, Finland	Finland	45.5802	8
PC-009	Allylestrenol [17-a-allylestr-4-en-17-beta-oll]	300.5	Organon, Finland	Finland	37.1787	9
PC-010	p-Aminobenzoic acid	137.1	Porin apteekki, Finland	Finland	56.485	10
PC-011	4-Aminoantipyrine [ampyrone]	203.2	Fluka, Germany	Germany	51.6331	11
PC-012	Amydricaine hydrochloride	314.9	Aurum, USA	USA	43.3694	12
PC-013	4-a-Androstane	260.5	Steraloids Inc., USA	USA	53.0141	13
PC-014	Antazoline hydrochloride	300.8	Merck, USA	USA	38.7229	14
PC-015	Antipyrine	188.2	Aldrich, USA	USA	60.0543	15
PC-016	Arecoline hydrobromide	236.1	Merck, USA	USA	83.6246	16
PC-017	Atenolol	266.3	Tamro, Finland	Finland	44.2498	17
PC-018	Atropine methyl nitrate	366.5	Merck, USA	USA	46.8403	18
PC-019	Bamethan	209.3	Merck, USA	USA	67.1141	19
PC-020	Barbital	184.2	Boehringer Ingelheim, Germany	Germany	64.7008	20
PC-021	Barbituric acid	128.1	Aldrich, USA	USA	48.8007	21
PC-022	Benzalkonium chloride	424.2	YA, Finland	Finland	0.0294207	22
PC-023	Benzocaine	165.2	YA, Finland	Finland	43.4369	23
PC-024	Bromhexine hydrochloride	412.6	Boehringer Ingelheim, Germany	Germany	64.8189	24
PC-025	Buclosamide	227.7	Merck, USA	USA	49.6389	25
PC-026	Bunitrolol	248.3	Boehringer Ingelheim, Germany	Germany	40.7255	26
PC-027	I-Bunolol	291.4	Warner-Lambert, USA	USA	59.638	27
PC-028	Busulfan	246.3	YA, Finland	Finland	51.8018	28
PC-029	Butethal	212.2	YA, Finland	Finland	45.2202	29
PC-030	Butidrine	247.4	Simes, Italy	Italy	73.0705	30
PC-031	Butyl 4-Aminobenzoate	193.3	Merck, USA	USA	76.6164	31
PC-032	p-Butylaminobenzoyldimethylaminoethanol	300.8	Hoechstag, Germany	Germany	45.3597	32
PC-033	1-Butyl-3-sulfanilylurea [carbutamide]	271.4	Orion, Finland	Finland	83.8981	33
PC-034	Cainopan, p-Butylaminobenzoyldimethylaminoethanol	300.8	YA, Finland	Finland	63.8344	34
PC-035	Calcium pantothenate	476.5	YA, Finland	Finland	67.9428	35
PC-036	DL-Camphon, Campher (synth.)	152.2	Merck, USA	USA	83.8957	36
PC-037	Carbamazepine	236.3	YA, Finland	Finland	57.2378	37
PC-038	Carteolol hydrochloride	328.9	Orion, Finland	Finland	67.2	38
PC-039	Cetrimonium bromide	364.5	YA, Finland	Finland	75.0225	39
PC-040	Chloramphenicol	323.1	Sigma, USA	USA	73.8446	40
PC-041	Chlordiazepoxide	299.8	Sigma, USA	USA	54.3026	41
PC-042	Chlorobutanol	177.5	Tamro, Finland	Finland	84.189	42
PC-043	4'-Chlorodiazepam	320	YA, Finland	Finland	63.9906	43
PC-044	Chloroquine	515.9	Sigma, USA		12.2	44
PC-045	Chlorothiazide	295.7	Byron Chemical Company, USA	USA	90.2903	45
PC-046	Chlorpromazine hydrochloride	318.9	Sigma, USA	USA	18.899	46
PC-047	Chlorprothixene hydrochloride	352.4	Orion, Finland	Finland	90.2662	47
PC-048	Cinchophen	249.3	Sigma, USA	USA	65.147	48
PC-049	Clioquinol	305.5	Oriola, Finland	Finland	71.9238	49
PC-050	Clopenthixol dihydrochloride	473.9	Lundbeck, Denmark	Denmark	55.1944	50
PC-051	Clorprenaline hydrochloride	213.7	Lilly, USA	USA	63.6877	51
PC-052	Cornecaine	317.2	YA, Finland	Finland	77.2871	52
PC-053	Cyclamic acid	179.2	Merck, USA	USA	74.9216	53
PC-054	Deoxycholic acid	392.6	Merck, USA	USA	86.5016	54
PC-055	Selegiline hydrochloride	223.8	Orion, Finland	Finland	57.0239	55
PC-056	Dequalinium chloride	527.6	Oriola, Finland	Finland	62.4833	56
PC-057	Desalkylflurazepam	288.7	YA, Finland	Finland	68.5149	57
PC-058	Dexbrompheniramine maleate	435.3	YA, Finland	Finland	69.5559	58
PC-059	Dexchlorpheniramine maleate	435.3	Tamro, Finland	Finland	68.0813	59
PC-060	Diazepam	284.8	Suomen rohdosyhtymä, Finland	Finland	73.6445	60
PC0-61	Dibucaine hydrochloride	379.9	Ciba, Finland	Finland	77.8232	61
PC-062	Dichloroisoproterenol hydrochloride	284.6	Lilly, USA	USA	49.5901	62
PC-063	Dicumarol	336.3	Merck	USA	65.6159	63
PC-064	Diethylpropion hydrochloride	241.8	Supro Troponwerke Köln, Germany		47.0962	64
PC-065	Digoxin	780.9	Merck, USA	USA	141.85	65
PC-066	1,8-Dihydroxyanthrone	226.2	YA, Finland	Finland	27.1763	66
PC-067	Diphenhydramine hydrochloride	291.9	Maunulan apteekki, Finland	Finland	41.0494	67
PC-068	Diphenylhydantoin [phenytoin]	252.3	YA, Finland	Finland	66.3081	68
PC-069	Metamizol sodium	351.4	YA, Finland	Finland	85.9846	69
PC-070	Doxepin hydrochloride	279.4	YA, Finland	Finland	21.6289	70
PC-071	Dulcin [p-phenetylurea]	180.2	Sigma, USA	USA	103.275	71
PC-072	Emetine dihydrochloride	553.6	YA, Finland	Finland	63.0682	72
PC-073	Ethamivan	223.3	Pharmacia Uppsala, Sweden	Sweden	85.482	73
PC-074	Ethopropazine hydrochloride	345	M & B, UK	UK	20.0548	74
PC-075	Ethyl 4-hydroxybenzoate	166.2	YA, Finland	Finland	127.816	75
PC-076	Ethylnorepinephrine	197.2	Hoechst, Germany	Germany	126.836	76
PC-077	17 -a-ethynylestradiol	296.4	Leiras, Finland	Finland	11.6721	77
PC-078	Etilefrin	181.2	Böhringer & Sohn, Germany	Germany	116.784	78
PC-080	Fenoprofen calcium salt	522.6	Lilly, USA	USA	87.5682	79
PC-081	Fenoterol hydrobromide	303.4	Boehringer Ingelheim, Germany	Germany	106.578	80
PC-082	Cis(Z)-Flupentixol dihydrochloride	475.4	Lundbeck, Denmark	Denmark	92.6035	81
PC-083	2-Amino-5-chloro-2'-fluorobenzophenone	249.7	YA, Finland	Finland	167.438	82
PC-084	Fluphenatzinemaleate	437.5	Sovirel, France	France	98.9348	83
PC-085	Folic acid	441.4	Sigma, USA	USA	100	84
PC-086	Guaifenesin	198.2	YA, Finland	Finland	124.465	85
PC-087	Hexobarbital	236.3	Merck, USA	USA	121.273	86
PC-088	Hexoprenaline	420.5	Linz, Austria	Austria	124.923	87
PC-089	Homatropine hydrobromide	356.3	YA, Finland	Finland	118.529	88
PC-090	Homotaurine	139.2	YA, Finland	Finland	118.731	89
PC-091	Hydrochlorothiazide	297.7	Orion, Finland	Finland	121.225	90
PC-092	Hydrocortisone acetate	404.5	Roussel Uclaf, France	France	116.825	91
PC-093	Hydroxychloroquine sulfate	434	The New Asiatic Pharmaceutical, China		128.899	92
PC-094	p-Hydroxyephedrine	181.2	Hoechst, Germany	Germany	94.4057	93
PC-096	N-Hydroxyethylpromethazine chloride	365	Orion, Finland	Finland	102.235	94
PC-097	Hydroxyzine hydrochloride	447.8	UCB, Belgium	Belgium	98.3297	95
PC-098	Ibufenac	192.3	The Boots Company, UK		102.178	96
PC-099	Ibuprofen	206.3	YA, Finland	Finland	92.7777	97
PC-100	Inositol	180.2	YA, Finland	Finland	105.994	98
PC-101	Isoetharine	239.3	YA, Finland	Finland	90.7028	99
PC-102	(+/-)-Isoproterenol hemisulfate salt	520.6	Sigma, USA	USA	110.859	100
PC-103	Isoproterenol hydrochloride [isoprenaline hydrochloride]	247.8	Winthrop, USA	USA	112.534	101
PC-104	(S)-(+)-Ketoprofen [(S)-2-(3-Benzoylphenyl)-propionic acid]	254.3	Sigma, USA	USA	103.214	102
PC-105	Labetalol hydrochloride	364.9	YA, Finland	Finland	72.5129	103
PC-106	Lorazepam	321.2	Sigma, USA	USA	98.1838	104
PC-107	Medazepam	270.8	YA, Finland	Finland	87.5174	105
PC-108	Mefenamic acid	241.3	Parke-Davis, USA	USA	103.486	106
PC-109	Menadione [2-Methyl-1,4-naphtoquinone]	172.2	Fluka, Germany	Germany	28.257	107
PC-110	Mephenesin [3-o(tolyloxy)1,2-propanediol]	182.2	Sigma, USA	USA	79.1894	108
PC-111	Mephentermine sulfate	424.7	Wyeth laboratories, USA	USA	81.8431	109
PC-112	Mepivacaine hydrochloride	282.9	AB Bofors, Sweden	Sweden	74.9384	110
PC-113	Mesoridazine besylate	544.8	Sandoz, Switzerland	Switzerland	93.8222	111
PC-114	Metaraminol bitartrate salt	317.3	Merck & Dohme, USA	USA	96.4524	112
PC-115	Methdilazine	296.4	YA, Finland	Finland	22.5356	113
PC-116	Methoxamine hydrochloride	247.7	Burroughs Wellcome, USA	USA	98.3862	114
PC-117	Methylatropine bromide	384.3	YA, Finland	Finland	70.8847	115
PC-118	L-Methyldopa	211.2	Orion, Finland	Finland	99.1322	116
PC-119	Methyl p-hydroxybenzoate	152.2	YA, Finland	Finland	69.346	117
PC-120	Metipranolol	309.4	Medica, Finland		46.1727	118
PC-121	Metronidazole	171.2	Medipolar, Finland	Finland	69.2415	119
PC-122	Metoprolol tartrate	684.8	Hässle, Sweden		65.7262	120
PC-123	Nadolol	309.4	Squibb, USA	USA	60.4632	121
PC-124	Nadoxolol	260.3	YA, Finland	Finland	20.7737	122
PC-125	Nalidixic acid	232.2	YA, Finland		80.4104	123
PC-126	Naproxen	230.3	ICN Biomedicals, USA	USA	92.7162	124
PC-127	Narceine	445.5	Aldrich, USA	USA	118.332	125
PC-128	Neomycin sulfate	614.7	YA, Finland	Finland	99.5581	126
PC-129	Nicotinamide	122.1	YA, Finland	Finland	116.878	127
PC-130	Nitrazepam	281.3	YA, Finland	Finland	45.9678	128
PC-131	Nitrofurantoin	238.2	Fluka, Germany	Germany	58.9204	129
PC-132	Nitrofurazone	198.1	Leiras, Finland	Finland	83.7128	130
PC-133	Nordefrin hydrochloride	219.7	Hoechst, Germany	Germany	117.995	131
PC-134	Norethindrone	298.4	Leiras, Finland	Finland	107.778	132
PC-135	Norfenefrine	153.2	YA, Finland	Finland	126.275	133
PC-136	Nortriptyline hydrochloride	299.9	Sigma, USA	USA	5.33777	134
PC-137	Noscapine	413.4	Oriola, Finland	Finland	103.451	135
PC-138	Octopamine hydrochloride	189.7	Tropenwerke Köln, Germany	Germany	102.081	136
PC-139	Opipramol	363.5	Ciba-Geigy, Switzerland	Switzerland	27.5272	137
PC-140	Ouabain	584.6	Porin apteekki, Finland	Finland	90.856	138
PC-141	Oxazepam	286.7	YA, Finland	Finland	79.0926	139
PC-142	Oxprenolol hydrochloride	301.9	Ciba-Geigy, Switzerland	Switzerland	92.3867	140
PC-143	Oxyphenbutazone	324.4	Orion, Finland	Finland	84.8297	141
PC-144	1-(4-Oxyphenyl)-1-oxy-2-ethylamonoethane	182.2	Sigma, USA	USA	86.9349	142
PC-145	Pantothenic acid, calcium salt monohydrate	476.5	YA, Finland	Finland	93.0737	143
PC-146	Papaverine	339.4	YA, Finland	Finland	99.2932	144
PC-147	Penbutolol	291.4	Hoechst, Germany	Germany	44.96	145
PC-148	Pentobarbital	226.1	Sigma, USA	USA	70.5279	146
PC-149	Perphenazine	404	Merck, USA	USA	10.602	147
PC-150	Phenacetin	179.2	YA, Finland	Finland	71.8461	148
PC-151	Phenacetin	179.2	YA, Finland	Finland	80.6081	149
PC-152	Phenazone c. coffeincitrat gran.	411.2	YA, Finland	Finland	83.9682	150
PC-153	Phenobarbital	232.2	YA, Finland	Finland	58.5629	151
PC-154	Phenylbutazone	308.4	Orion, Finland	Finland	96.6736	152
PC-155	L-Phenylephrine hydrochloride	203.7	YA, Finland	Finland	85.0788	153
PC-156	Phenyl salicylate	214.2	YA, Finland	Finland	118.225	154
PC-157	Pholedrine sulfate	428.6	Knoll AG, Germany		92.8031	155
PC-158	Phthalylsulfacetamide	362.4	Abic Ltd., Israel		110.596	156
PC-159	Phthalylsulfathiazole	403.4	Arkadia, Finland	Finland	113.738	157
PC-160	Pindolol	248.3	Orion, Finland	Finland	86.24	158
PC-161	p-Phenoxyethanolisopropylaminosulfate	452.3	YA, Finland	Finland	99.0464	159
PC-162	Practolol	266.4	Orion, Finland	Finland	117.322	160
PC-163	Prednisolone	360.4	Oriola, Finland	Finland	104.224	161
PC-164	Prednisone	358.4	Oriola, Finland	Finland	84.961	162
PC-165	Primidone	218.3	Maunulan apteekki, Finland	Finland	127.099	163
PC-166	Procainamide hydrochloride	271.8	YA, Finland	Finland	89.0111	164
PC-167	Procaine hydrochloride	272.8	Merck, USA	USA	105.385	165
PC-168	Prochlorperazine	373.9	May & Baker, UK	UK	51.3828	166
PC-169	Promethazine hydrochloride	320.9	Rhodia Pharma, UK		48.8193	167
PC-170	Pronethalol	265.8	ICI, USA	USA	62.8934	168
PC-171	Propantheline bromide	448.4	Star, Finland		77.0236	169
PC-172	2-(3-Carboxyphenyl)propionic acid	74.1	British Pharmacopeia Commission Laboratory, UK	UK	105.722	170
PC-173	Propranol tropeoline	237.9	YA, Finland	Finland	95.8602	171
PC-174	Propranolol hydrochloride	295.8	Medipolar, Finland	Finland	73.9945	172
PC-175	Propyphenazone	230.3	YA, Finland	Finland	50.9156	173
PC-176	Prothipendyl hydrochloride	321.9	Draco, Finland	Finland	7.3923	174
PC-177	Protokylol hydrochloride	367.8	Tropon, Germany	Germany	128.399	175
PC-178	Pyridoxine hydrochloride	205.6	Oriola, Finland	Finland	100.927	176
PC-179	Pyrilamine maleate	401.5	Rhodia Pharma, UK		73.659	177
PC-180	Quinidine polygalacturonate	536.6	Orion, Finland	Finland	67.4352	178
PC-181	Resorcinol	110.1	YA, Finland	Finland	67.0986	179
PC-182	Riboflavin	376.4	Oriola, Finland	Finland	43.0916	180
PC-183	Saccharin sodium	205.2	Fluka, Germany	Germany	104.993	181
PC-184	Salbutamol	239.3	Huhtamäki Oy, Pharmaceuticals, Finland	Finland	151.374	182
PC-185	(+/-) Salbutamol sulfate	576.7	Leiras, Finland	Finland	104.96	183
PC-186	Salicylamide	137.1	Fluka, Germany	Germany	126.203	184
PC-187	Salicylsalicylic acid	258.2	Boehringer Ingelheim, Germany	Germany	127.367	185
PC-188	Santonin	246.3	YA, Finland	Finland	99.9448	186
PC-189	Phenobarbital sodium	254.2	Geigy, Switzerland	Swizerland	88.0986	187
PC-191	Sotalol hydrochloride	308.9	Fluka, Germany	Germany	100.535	188
PC-192	Sulfacetamide	214.2	Katwijk, Netherlands	Netherlands	100.783	189
PC-193	Sulfadiazine	250.3	YA, Finland	Finland	107.719	190
PC-194	Sulfadimethoxine	310.3	YA, Finland	Finland	102.356	191
PC-195	Sulfaethidole	284.4	Smith Kline & Fench Labs., USA	USA	106.417	192
PC-196	Sulfaguanidine	214.2	Sigma, USA	USA	63.5343	193
PC-197	Sulfamerazine	264.3	YA, Finland	Finland	83.8059	194
PC-198	Sulfameter	280.3	Orion, Finland	Finland	98.9848	195
PC-199	Sulfamethazine	278.3	Oriola, Finland	Finland	91.6684	196
PC-200	Sulfamethizole	270.3	Leiras, Finland	Finland	100.408	197
PC-201	Sulfamethoxazole	253.3	YA, Finland	Finland	77.5103	198
PC-202	Sulfamethoxypyridazine	280.3	YA, Finland	Finland	110.031	199
PC-203	Sulfamethylthiadiazole	270.3	Ved Berlin, Germany	Germany	89.6325	200
PC-204	Sulfamoxole	267.3	Aldrich, USA	USA	83.0059	201
PC-205	Sulfanilamide	172.2	Imperial Chem. Ind. Limited, UK	UK	64.1583	202
PC-206	N-Sulfanilyl-3,4-xylamide	304.4	YA, Finland	Finland	72.0387	203
PC-207	Sulfaperine	264.3	Medica, Finland		127.815	204
PC-208	Sulfapyridine	249.3	Merck, USA	USA	94.9598	205
PC-209	Sulfathiazole	255.3	Fluka, Germany	Germany	138.148	206
PC-210	Sulfisoxazole	267.3	Sigma, USA	USA	91.4463	207
PC-211	Sulfonmethane	228.3	Sigma, USA	USA	86.626	208
PC-212	Talinolol	363.5	Arzneimittelwerk, Germany	Germany	76.8856	209
PC-213	Temazepam	300.7	YA, Finland	Finland	91.4596	210
PC-214	Terbutaline hemisulfate salt	548.7	AB Draco/Astra, Sweden	Sweden	97.5466	211
PC-215	Tetracaine hydrochloride	300.8	Merck, USA	USA	102.807	212
PC-216	Theobromine	180.2	YA, Finland	Finland	112.094	213
PC-217	Theophylline	180.2	YA, Finland	Finland	87.8061	214
PC-218	7-(2,3-Dihydroxypropyl)theophylline	254.2	YA, Finland	Finland	100.073	215
PC-219	7- (β-Hydroxypropyl)theophylline	238.2	YA, Finland	Finland	125.455	216
PC-220	Thiamine mononitrate	327.4	Sigma, USA	USA	95.2264	217
PC-221	Thiethylperazine	399.6	Sandoz, Switzerland	Switzerland	26.5266	218
PC-222	1,3-Diethyl-2-thiobarbituric acid [thiobarbital]	200.3	Merck, USA	USA	75.6989	219
PC2--23	Thioridazine	370.6	Sandoz, Switzerland	Switzerland	11.5965	220
PC2--24	6-Propyl-2-thiouracil	170.2	Sigma, USA	USA	80.9658	221
PC-225	Timolol maleate	432.5	Orion, Finland	Finland	129.101	222
PC-226	Tinidazole	247.3	Orion, Finland	Finland	104.114	223
PC-227	Tinopal	961	YA, Finland	Switzerland	75.2722	224
PC-228	(+)-a-Tocopherol acid succinate	530.8	Sigma, USA	USA	75.2722	225
PC-229	Tolazoline, hydrochloride	196.7	Sigma, USA	USA	75.9922	226
PC-230	Tolbutamide	270.3	Novo, Denmark	Denmark	80.2124	227
PC-231	Tolfenamic acid	261.7	TYKS Apteekki, Finland	Finland	80.1124	228
PC-232	Tranylcypromine sulfate	133.9	SK&F, Germany	Germany	94.7998	229
PC-233	Triamterene	253.3	Farmos-Yhtymä Oy, Finland	Finland	92.9729	230
PC-234	Triazolam	343.2	Sigma, USA	USA	76.4915	231
PC-235	Trimeprazine tartrate	747.1	Sigma, USA	USA	120.399	232
PC-236	Sulfaninyl urea hydrate	215.2	YA, Finland	Finland	120.176	233
PC-237	Xylometazoline	244.4	YA, Finland	Finland	94.2344	234
aValues represent surviving fractions (remaining precentages of Semliki Forest virus (SFV) replication).
SUPPLEMENTARY TABLE 2. Moderately active compounds against SFV. The primary screen against Semliki Firest virus was conducted at concentration 50 µM of each compound (see Materials and methods of the article for experimental details). Compounds yielding 25 - 60% of remaining SFV replication (as indicated in column "% left") are listed below.
ID	Chemical name	% left
Natural compounds
NC-006	3-Benzoylbenzo(F)coumarin	39.9324
NC-015	Coumarin 102	34.6
NC-017	Coumarin 7	37.2835
NC-042	Genistein	45.6
NC-055	2,4-Dihydroxylbenzoic acid	32.0629
NC-056	Isorhamnetin	28.9195
NC-066	2'-Methoxy-a-naphthoflavone	45.7928
NC-071	Nordihydroguaiaretic acid	35.5647
NC-090	Rutin	44.1
NC-096	Sinigrin monohydrate	47.6
NC-098	Tannic acid	41.7653
NC-101	Thymol	41.9535
NC-102	3,4,5-Trimethoxybenzoic acid	34.1
NC-106	Vanillin	47.9002
Pharmaceutical compounds
PC-032	p-Butylaminobenzoyldimethylaminoethanol	45.2
PC-037	Carbamazepine	57.3
PC-041	Chlordiazepoxide	54.3
PC-050	Clopenthixol dihydrochloride	55.2
PC-055	Selegiline hydrochloride	57.6
PC-120	Metipranolol	46.7
PC-130	Nitrazepam	46.6
PC-147	Penbutolol	46.5
PC-169	Promethazine hydrochloride	46.2
PC-175	Propyphenazone	49.9
PC-182	Riboflavin	43.1
PC-196	Sulfaguanidine	36.9
PC-205	Sulfanilamide	35.6
